# Supplementary material
Source: Copernicus journal article supplement (doi:10.5194/essd-2026-347)
Supplement: Supplementary file 1 [file essd-2026-347-supplement.pdf]

## *Supplementary Information*

### **Mapping 20-years winter wheat dynamics in global primary planting areas using Gaussian mixture models with adaptive thresholds**

Yanan Wen<sup>1,2#</sup>, Tuo Chen<sup>3#</sup>, Xuecao Li<sup>3\*</sup>, Tiecheng Bai<sup>1\*</sup>, Ke Yao<sup>4</sup>, Liheng Zhong<sup>5</sup>, Han Chen<sup>6</sup>, Meiling Liu<sup>2</sup>, Xieqin Huang<sup>7,8</sup>, Shunlin Liang<sup>9</sup>, Shuangxi Miao<sup>4</sup>, Jianxi Huang<sup>4,10\*</sup>

<sup>1</sup> Key Laboratory of Tarim Oasis Agriculture (Tarim University), Ministry of Education, Alar, 843300, China

<sup>2</sup> School of Information Engineering, China University of Geoscience, Beijing, 100083, China

<sup>3</sup> Guangdong Key Laboratory for Urbanization and Geo-simulation, School of Geography and Planning, Sun Yat-Sen University, Guangzhou, 510006, China

<sup>4</sup> College of Land Science and Technology, China Agricultural University, Beijing, 100083, China

<sup>5</sup> Ant Group, World Financial Center, Beijing, 100000, China

<sup>6</sup> Swiss Reinsurance Company Ltd Beijing Branch, Beijing, 100022, China

<sup>7</sup> Department of Computer Science and Technology, Tsinghua University, Beijing, 100190, China

<sup>8</sup> School of Geospatial Engineering and Science, Sun Yat-Sen University, Guangzhou, 510275, China

<sup>9</sup> Department of Geography, The University of Hong Kong, 999077, Hong Kong, China

<sup>10</sup> Faculty of Geosciences and Engineering, Southwest Jiaotong University, Chengdu, 611756, China

# These authors contributed equally.

Correspondence to: Xuecao Li ([lixc26@mail.sysu.edu.cn](mailto:lixc26@mail.sysu.edu.cn)); Tiecheng Bai ([baitiecheng@taru.edu.cn](mailto:baitiecheng@taru.edu.cn)); Jianxi Huang ([jxhuang@cau.edu.cn](mailto:jxhuang@cau.edu.cn))

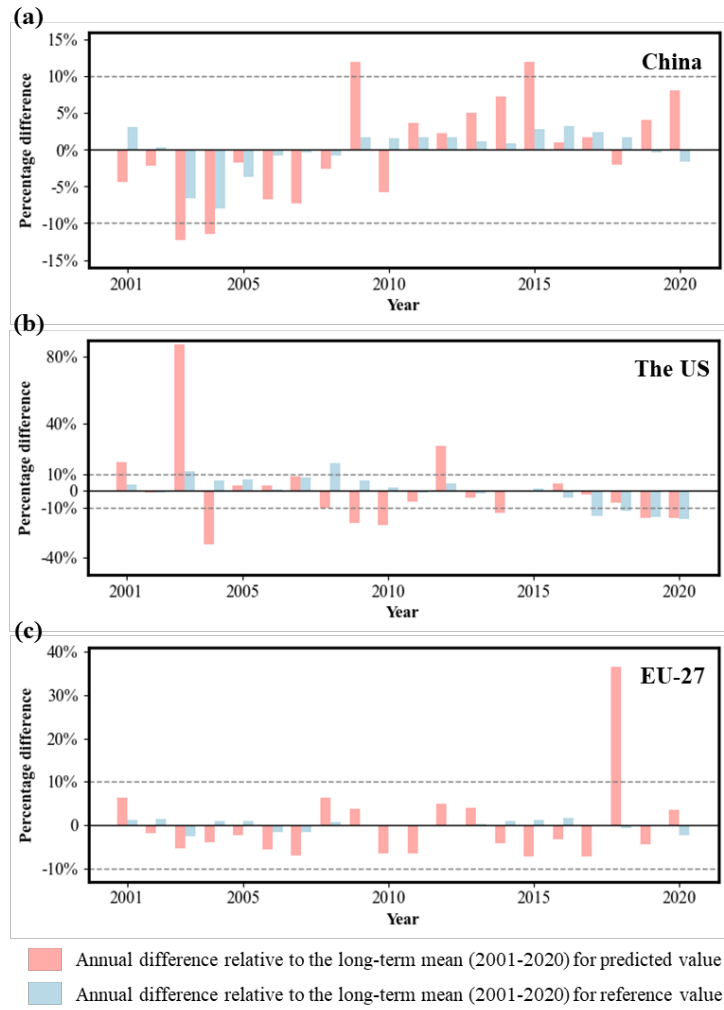

**Fig S1.** The annual difference relative to the long-term mean (2001-2020) for reference and predicted values in China (a), the US (b), and the EU-27 (c).

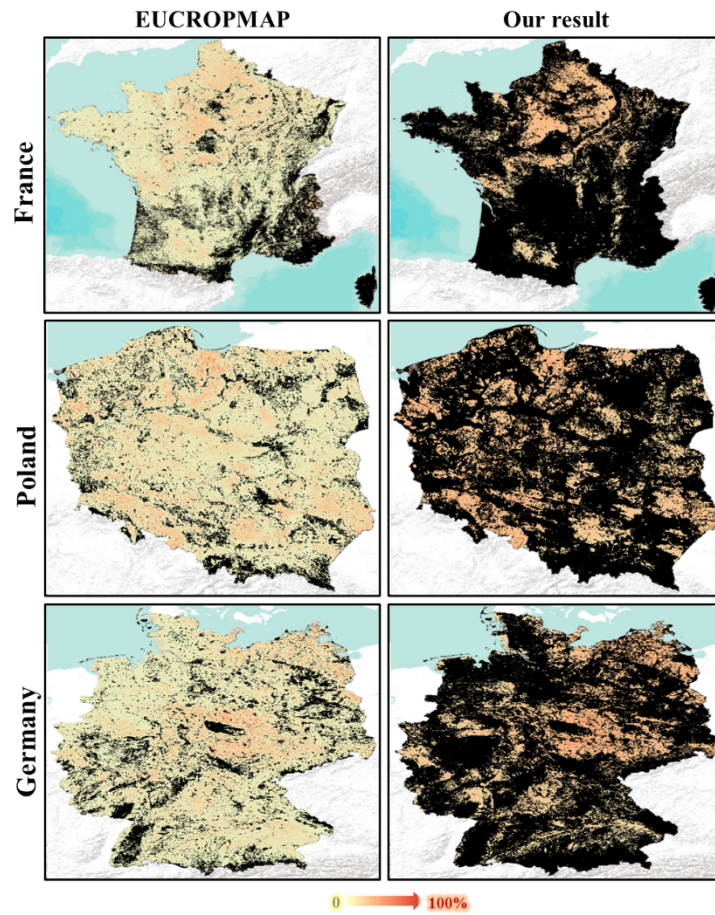

**Fig S2.** Mapping performance in our study area between the EUCROPMAP product (left) and our mapped results (right) in 2018.

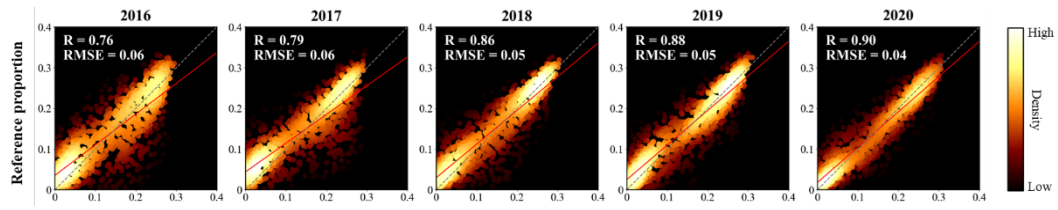

**Fig S3.** The Comparison of aggregated winter wheat fraction data at 5km between our results and the 30m winter wheat maps in China from 2016 to 2020.

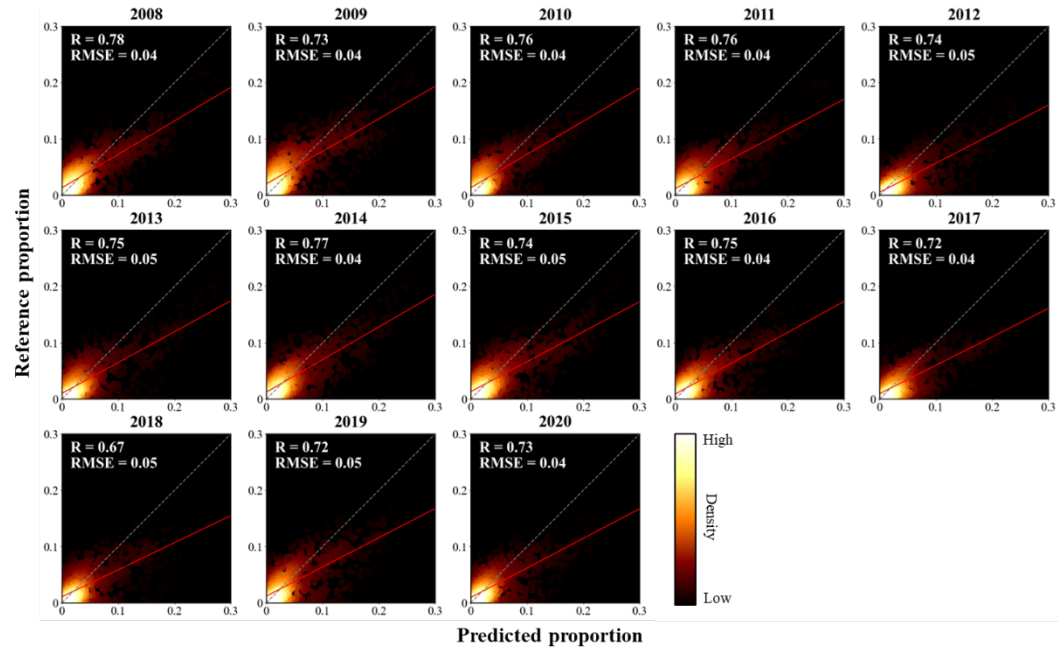

**Fig S4.** The Comparison of aggregated winter wheat fraction data at 5km between our results and the CDL data in the US from 2008 to 2020.

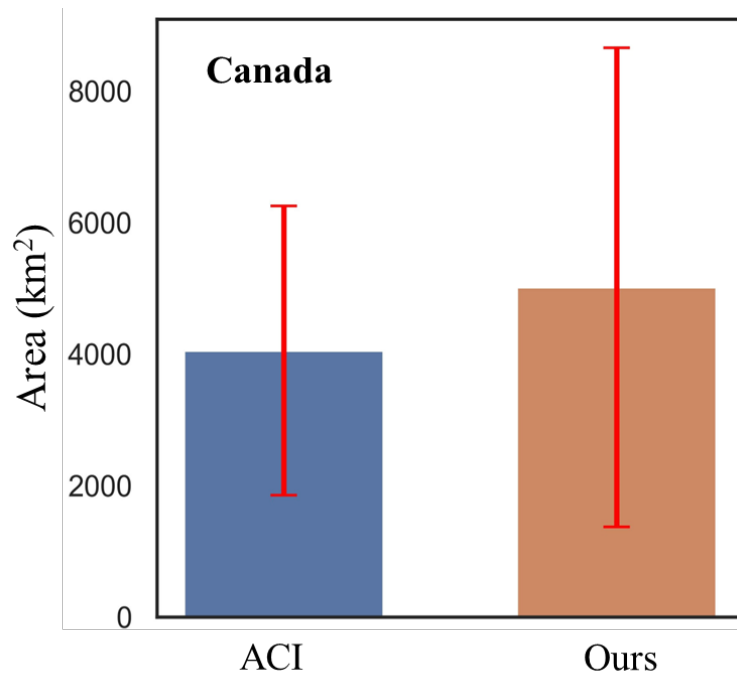

**Fig S5.** Comparison of region-scale winter wheat areas between our mapped results and the public crop datasets in Canada.
